# Supplementary material for: Altered human gut virome in patients undergoing antibiotics therapy for Helicobacter pylori
Source: PubMed Central journal article supplement (PMC10110541; doi:10.1038/s41467-023-37975-y), 2023-04-17
Supplement: 41467_2023_37975_MOESM2_ESM.pdf [file 41467_2023_37975_MOESM2_ESM.pdf]

## Description of Additional Supplementary Files

File Name: Supplementary Data 1

Description: **Current HP eradication regimens for all patients**

File Name: Supplementary Data 2

Description: **Prior failed HP eradication regimens for patients who failed prior current treatment**

File Name: Supplementary Data 3

Description: **MaAslin2 output for the microbiome taxonomy & microbiome correlation analysis**
